# Supplementary material
Source: PubMed Central journal article supplement (PMC5690815)
Supplement: NIHMS903538-supplement-1.pdf [file NIHMS903538-supplement-1.pdf]

A

| Marker                              | % pos | MFI |
|-------------------------------------|-------|-----|
| <b>Uninfected DCs</b>               |       |     |
| CD54                                | 75.2  | 191 |
| CD58                                | 82.3  | 153 |
| CD80                                | 10.3  | 105 |
| <b>FP-WT (40 MOI)</b>               |       |     |
| CD54                                | 79.1  | 215 |
| CD58                                | 80.7  | 179 |
| CD80                                | 10.7  | 101 |
| <b>rF-Brachyury-TRICOM (10 MOI)</b> |       |     |
| CD54                                | 85.3  | 284 |
| CD58                                | 83.8  | 198 |
| CD80                                | 29.8  | 151 |
| <b>rF-Brachyury-TRICOM (20 MOI)</b> |       |     |
| CD54                                | 86.2  | 337 |
| CD58                                | 85.5  | 221 |
| CD80                                | 36.8  | 189 |
| <b>rF-Brachyury-TRICOM (40 MOI)</b> |       |     |
| CD54                                | 91.8  | 991 |
| CD58                                | 88.7  | 343 |
| CD80                                | 60    | 264 |

B

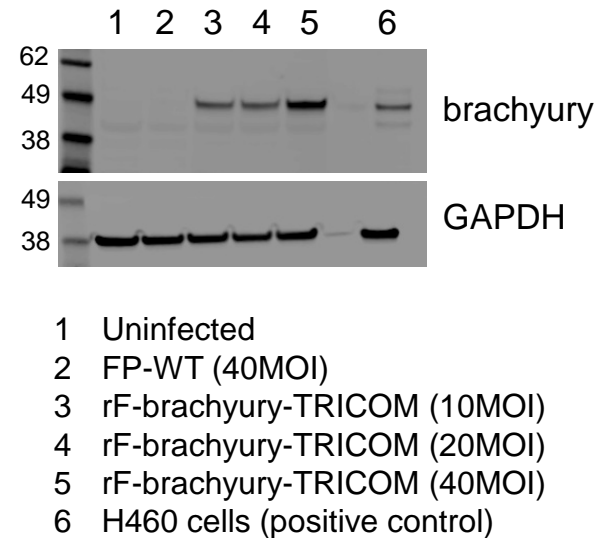

**Supplementary Figure S1.** Characterization of rF-brachyury-TRICOM. **(A)** FACS analysis of CD54, CD58 and CD80 costimulatory molecules expressed on human DCs following infection with indicated vectors at indicated MOIs (multiplicity of infection). Shown are the % positive cells and the MFI (mean fluorescence intensity). **(B)** Western blot analysis of protein lysates from human DCs infected with indicated vectors and evaluated with a brachyury-specific monoclonal antibody (MAb-54-1). H460 cells are brachyury positive and were used as a positive control. GAPDH is shown as a loading control.
